# Supplementary material for: Gallium-Telluride-Based Composite as Promising Lithium Storage Material
Source: MDPI journal article supplement (doi:10.3390/nano12193362), 2022-09-27
Supplement: s1 [file s1]

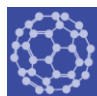

## SUPPORTING INFORMATION

# Gallium telluride-based composite for the promising lithium storage material

Vo Pham Hoang Huy, Il Tae Kim \* and Jaehyun Hur \*

Department of Chemical and Biological Engineering, Gachon University, Seongnam, Gyeonggi 13120, Korea

\* Correspondence: itkim@gachon.ac.kr (I.T.K.); jhhur@gachon.ac.kr (J.H.)

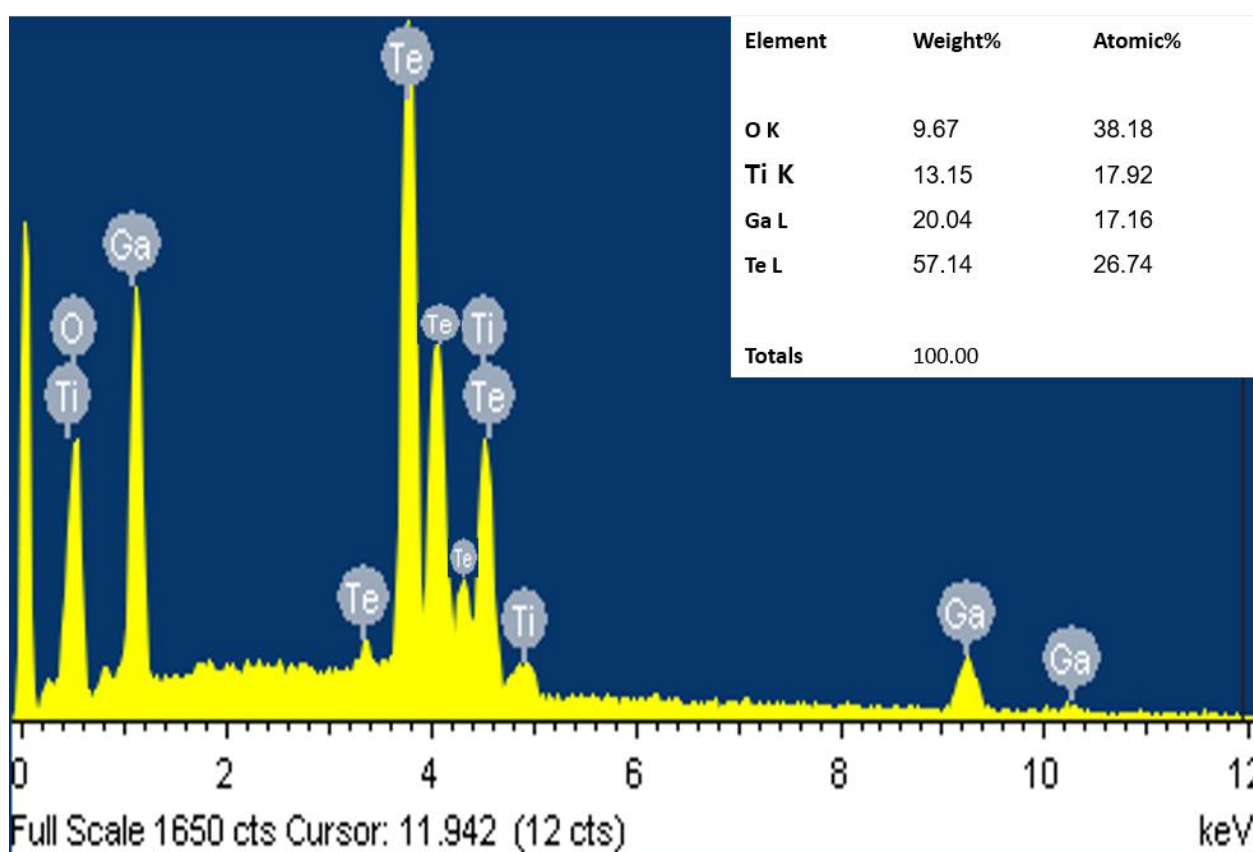Figure S1. EDX spectrum of as-synthesized  $\text{Ga}_2\text{Te}_3\text{-TiO}_2$ .

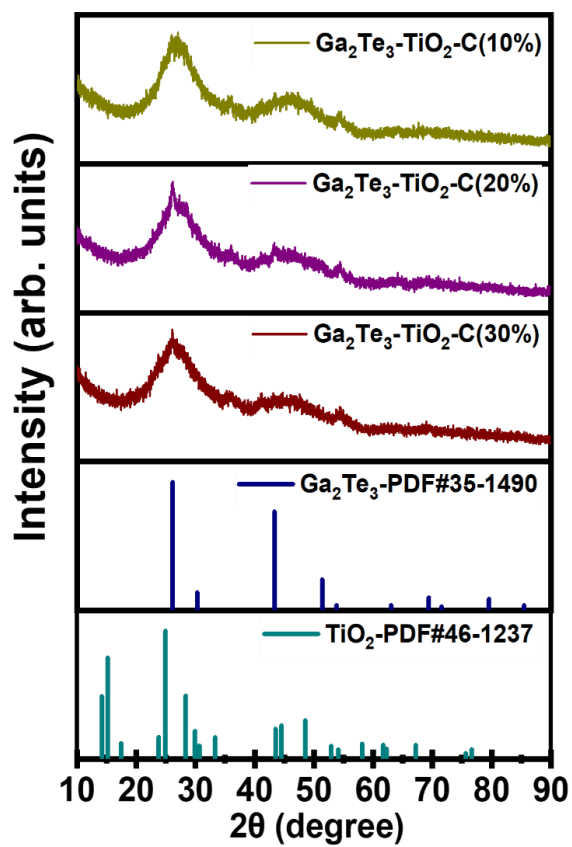

Figure S2. XRD pattern of  $\text{Ga}_2\text{Te}_3\text{-TiO}_2\text{-C}$  with different concentration of C.

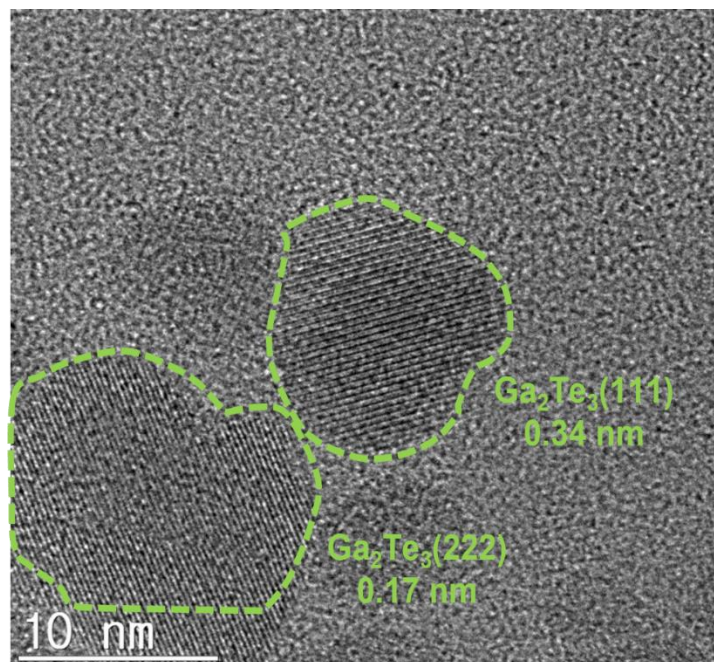

Figure S3. HRTEM image of  $\text{Ga}_2\text{Te}_3\text{-TiO}_2\text{-C}$ (10%).

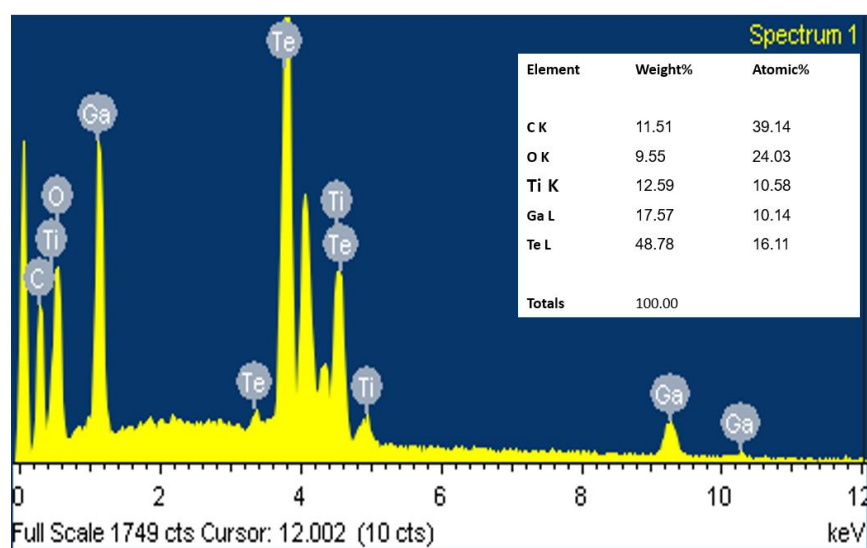

Figure S4. EDX spectrum of as-synthesized  $\text{Ga}_2\text{Te}_3\text{-TiO}_2\text{-C}(10\%)$ .

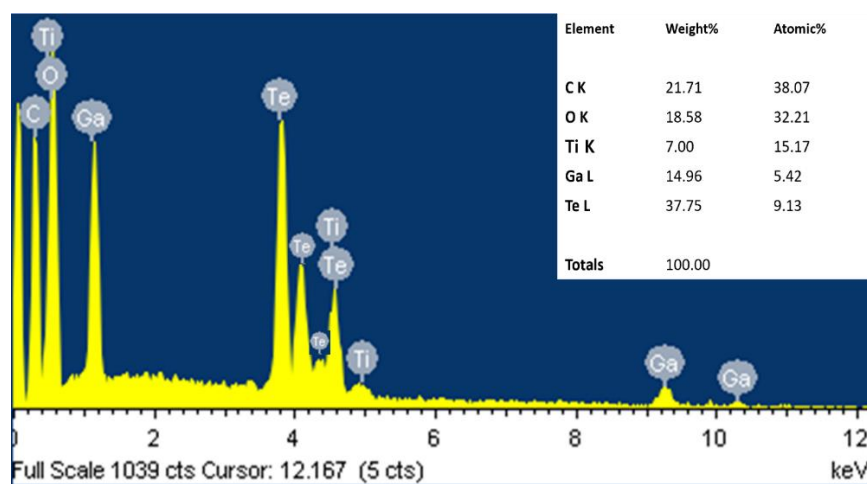

Figure S5. EDX spectrum of as-synthesized  $\text{Ga}_2\text{Te}_3\text{-TiO}_2\text{-C}(20\%)$ .

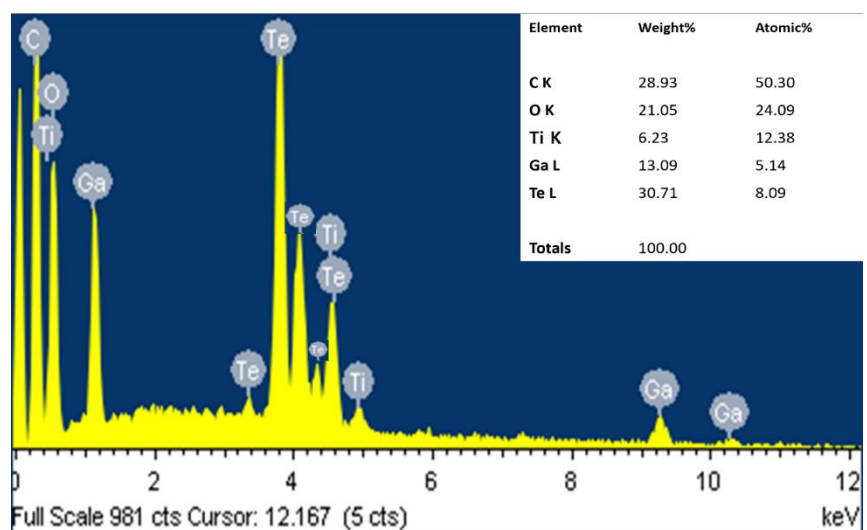

Figure S6. EDX spectrum of as-synthesized  $\text{Ga}_2\text{Te}_3\text{-TiO}_2\text{-C}(30\%)$ .

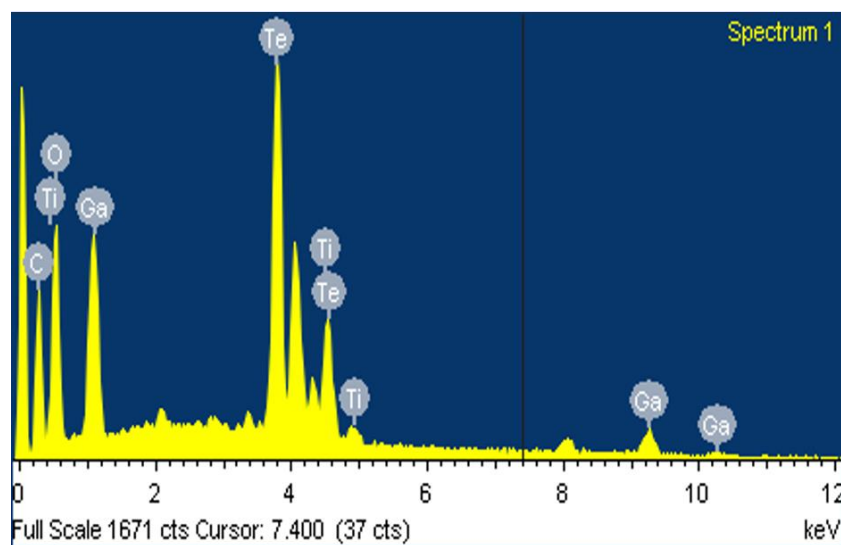

Figure S7. EDX spectrum of  $\text{Ga}_2\text{Te}_3\text{-TiO}_2\text{-C}(10\%)$  anode.

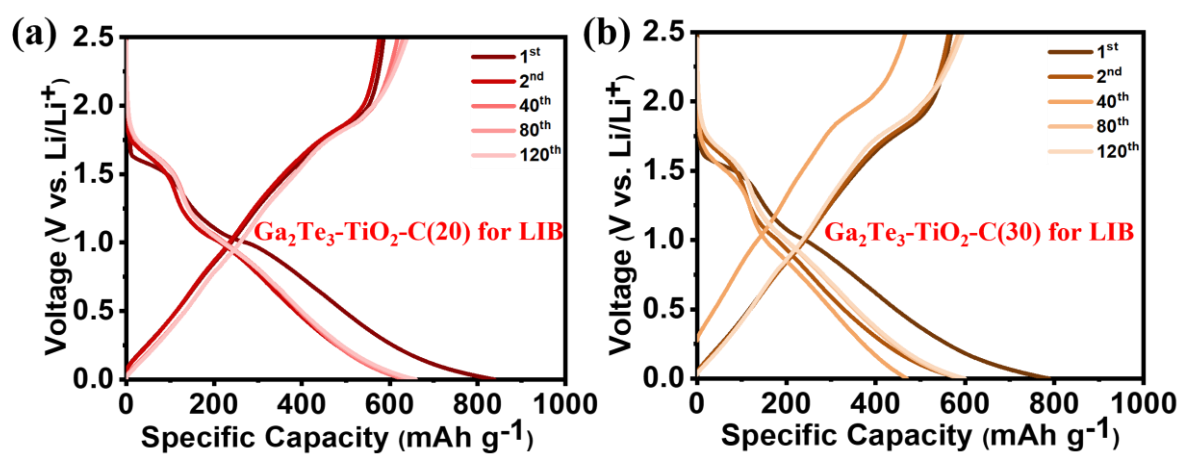

Figure S8. Galvanostatic discharge-charge profiles of (a)  $\text{Ga}_2\text{Te}_3\text{-TiO}_2\text{-C}(20\%)$  and (b)  $\text{Ga}_2\text{Te}_3\text{-TiO}_2\text{-C}(30\%)$ .

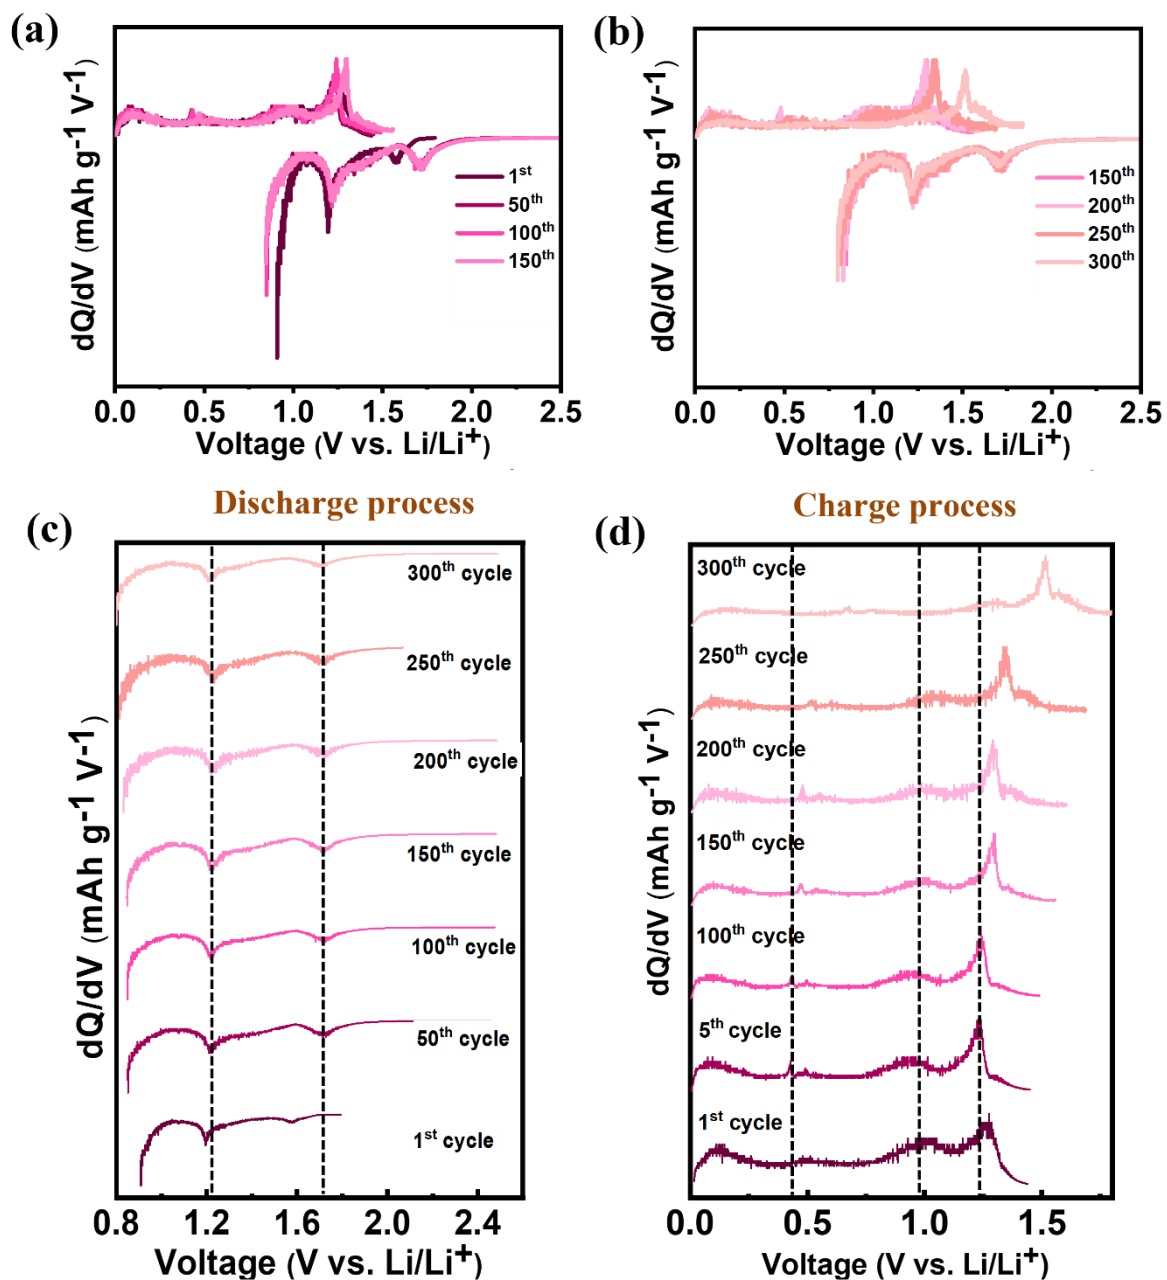

**Figure S9.** DCP profiles of Ga<sub>2</sub>Te<sub>3</sub>-TiO<sub>2</sub>-C(10%) during 300 cycles measured at 100 mA g<sup>-1</sup>: (a) 1–150 cycles and (b) 150–300 cycle. Enlarged view of (c) reduction and (d) oxidation peaks.

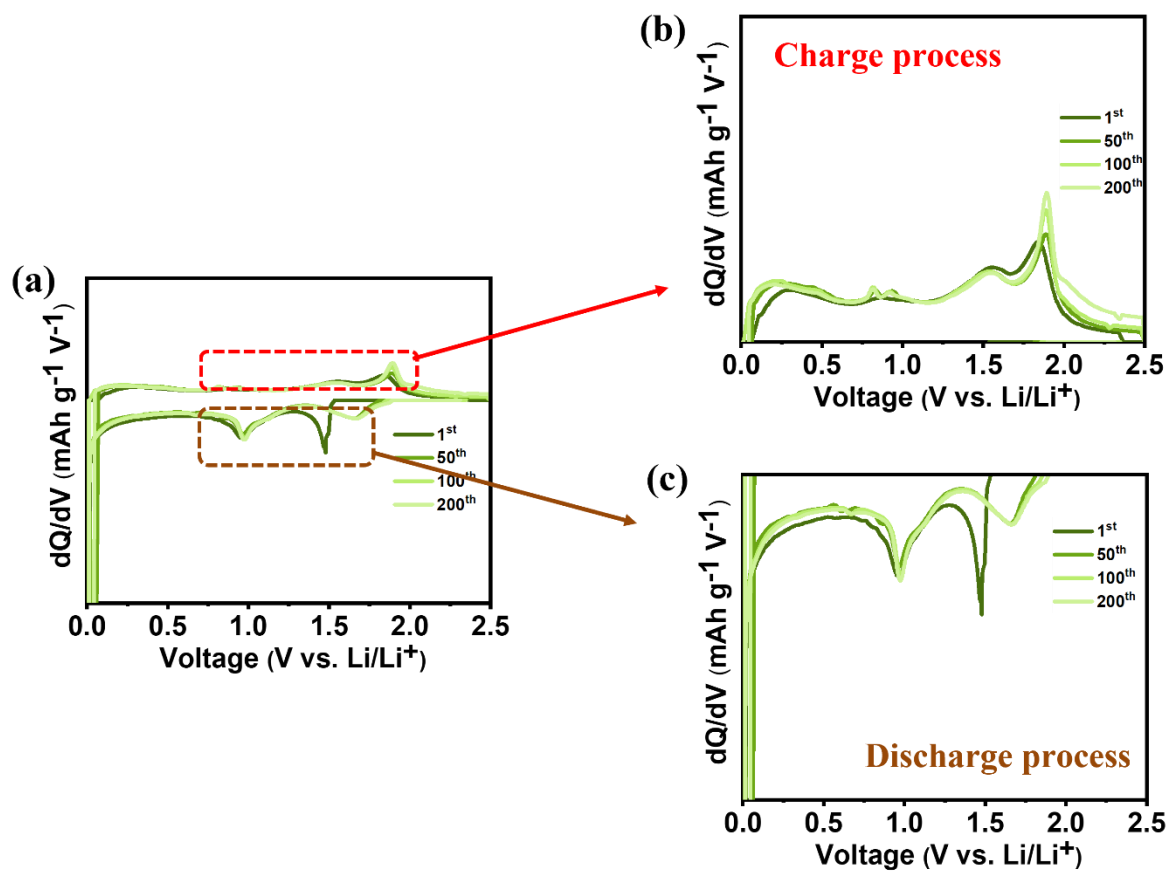

**Figure S10.** (a) DCP profiles of Ga<sub>2</sub>Te<sub>3</sub>-TiO<sub>2</sub>-C(10%) during initial 200 cycles measured at 500 mA g<sup>-1</sup>. Enlarged view of (b) oxidation and (c) reduction peaks.

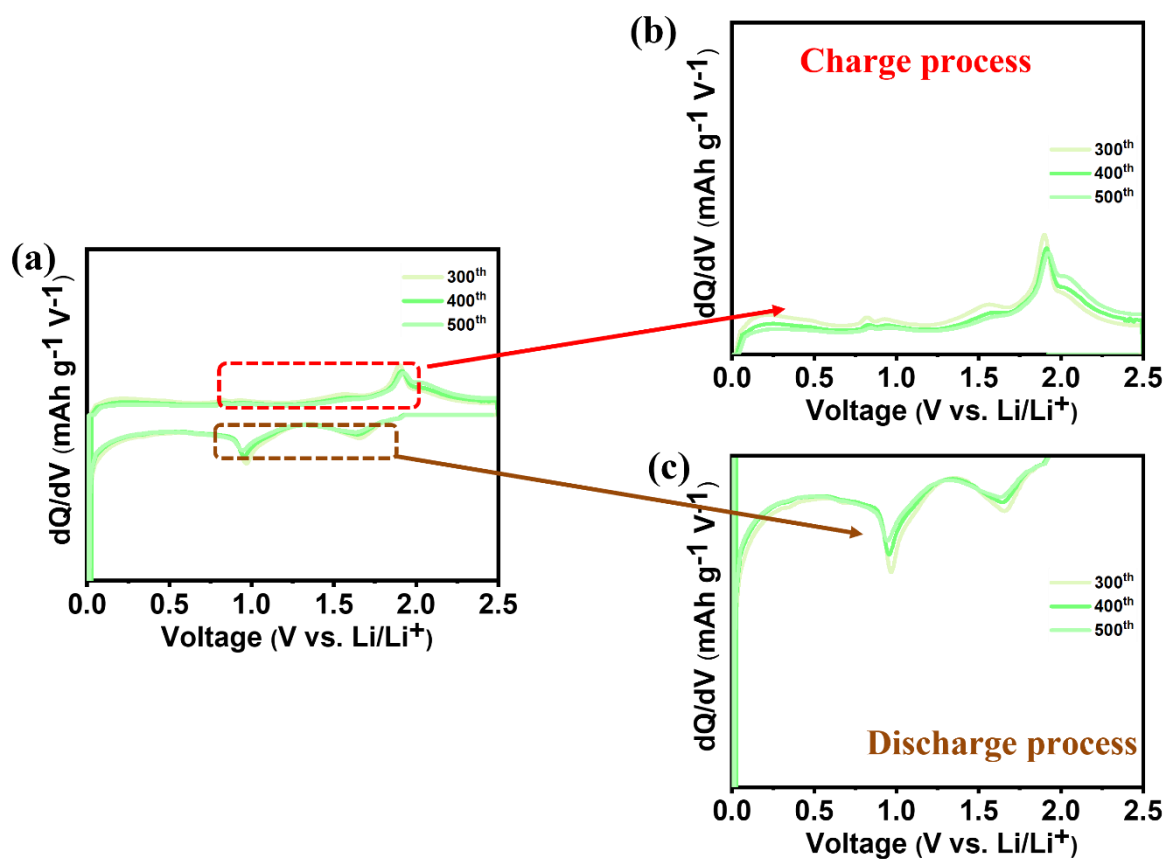

**Figure S11.** DCP profiles of Ga<sub>2</sub>Te<sub>3</sub>-TiO<sub>2</sub>-C(10%) from 300 cycle to 500 cycles measured at 500 mA g<sup>-1</sup>. Enlarged view of (b) oxidation and (c) reduction peaks.

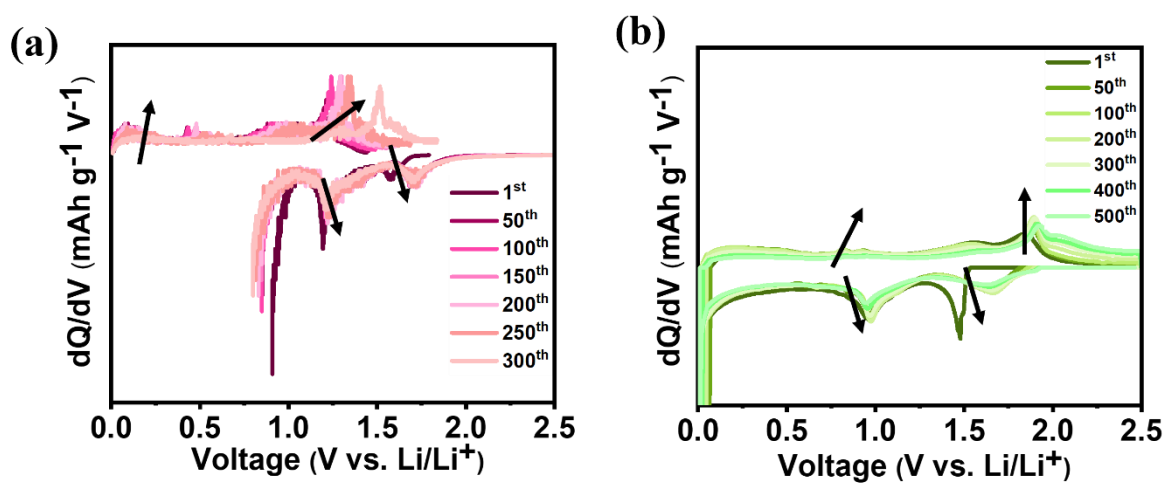

**Figure S12.** DCP profiles of Ga<sub>2</sub>Te<sub>3</sub>-TiO<sub>2</sub>-C(10%) at current density (a) at 100 mA g<sup>-1</sup> and during 300 cycles and (b) at 500 mA g<sup>-1</sup> during 500 cycles.

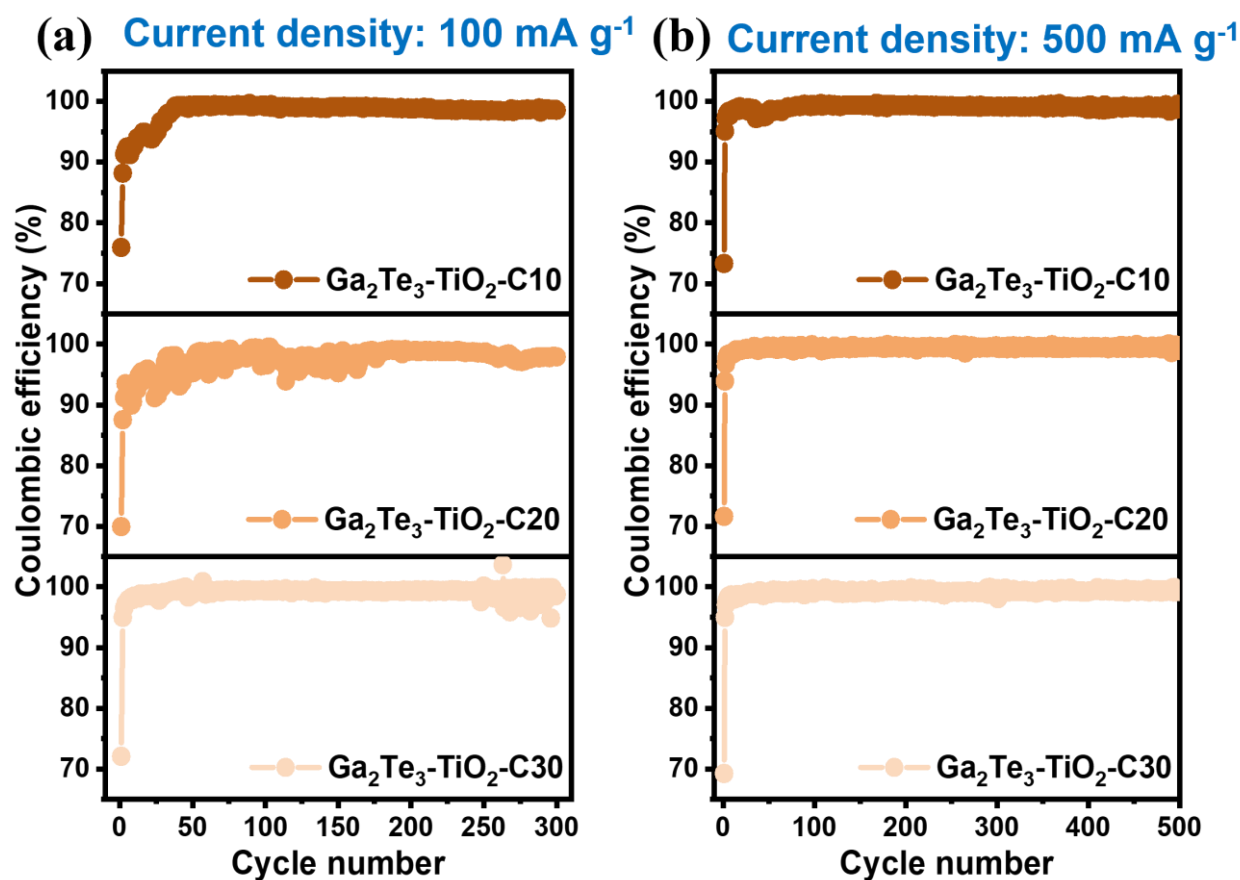

Figure S13. Coulombic efficiency of Ga<sub>2</sub>Te<sub>3</sub>-TiO<sub>2</sub> with different C content at current densities of (a) 100 and (b) 500 mA g<sup>-1</sup>.

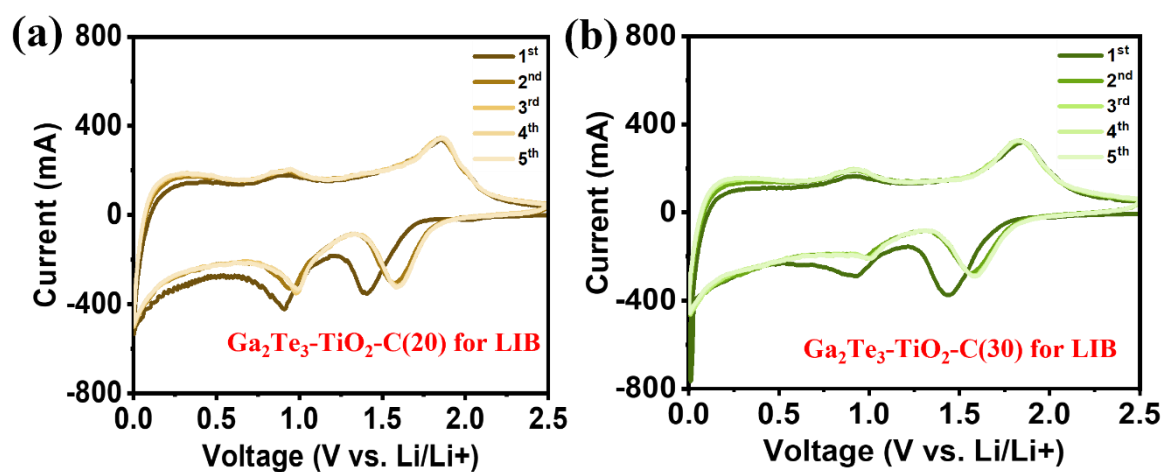

Figure S14. CV curves of (a) Ga<sub>2</sub>Te<sub>3</sub>-TiO<sub>2</sub>-C(20%) and (b) Ga<sub>2</sub>Te<sub>3</sub>-TiO<sub>2</sub>-C(30%) for LIBs.



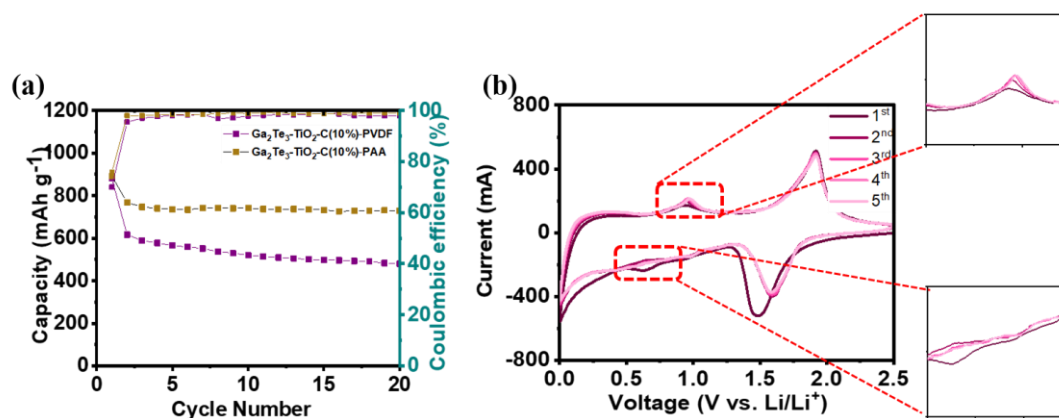

**Figure S15.** (a) Cycling performance of Ga<sub>2</sub>Te<sub>3</sub>-TiO<sub>2</sub>-C (10%) with PAA and PVDF binder, (b) CV curves of Ga<sub>2</sub>Te<sub>3</sub>-TiO<sub>2</sub>-C(10%) with PVDF binder.

**Table S1.** Calculation of capacity contribution of Ga<sub>2</sub>Te<sub>3</sub>, TiO<sub>2</sub> and C in the Ga<sub>2</sub>Te<sub>3</sub>-TiO<sub>2</sub>-C(10%) composite in LIB.

|                                                                                               | Ga <sub>2</sub> Te <sub>3</sub> | TiO <sub>2</sub> | C    |
|-----------------------------------------------------------------------------------------------|---------------------------------|------------------|------|
| The mole of Li-ion participating reaction                                                     | 10                              | 1                | 0.17 |
| Molecular weight (g mol <sup>-1</sup> )                                                       | 522.24                          | 79.9             | 12   |
| Calculated theoretical capacity (mAh g <sup>-1</sup> )                                        | ~513                            | ~336             | ~380 |
| Actual weight fraction in the Ga <sub>2</sub> Te <sub>3</sub> -TiO <sub>2</sub> -C composite. | 0.66                            | 0.22             | 0.11 |
| Contributed capacity (mAh g <sup>-1</sup> )                                                   | 339                             | 74               | 42   |
| Capacity contribution (%)                                                                     | 75                              | 16               | 9    |

**Table S2.** Calculation of capacity contribution of Ga<sub>2</sub>Te<sub>3</sub>, TiO<sub>2</sub> and C in the Ga<sub>2</sub>Te<sub>3</sub>-TiO<sub>2</sub>-C(20%) composite in LIB.

|                                                                                               | Ga <sub>2</sub> Te <sub>3</sub> | TiO <sub>2</sub> | C    |
|-----------------------------------------------------------------------------------------------|---------------------------------|------------------|------|
| The mole of Li-ion participating reaction                                                     | 10                              | 1                | 0.17 |
| Molecular weight (g mol <sup>-1</sup> )                                                       | 522.24                          | 79.9             | 12   |
| Calculated theoretical capacity (mAh g <sup>-1</sup> )                                        | ~513                            | ~336             | ~380 |
| Actual weight fraction in the Ga <sub>2</sub> Te <sub>3</sub> -TiO <sub>2</sub> -C composite. | 0.53                            | 0.26             | 0.22 |
| Contributed capacity (mAh g <sup>-1</sup> )                                                   | 272                             | 87               | 84   |
| Capacity contribution (%)                                                                     | 61                              | 20               | 19   |

**Table S3.** Calculation of capacity contribution of Ga<sub>2</sub>Te<sub>3</sub>, TiO<sub>2</sub> and C in the Ga<sub>2</sub>Te<sub>3</sub>-TiO<sub>2</sub>-C(30%) composite in LIB.

|                                                                                               | Ga <sub>2</sub> Te <sub>3</sub> | TiO <sub>2</sub> | C    |
|-----------------------------------------------------------------------------------------------|---------------------------------|------------------|------|
| The mole of Li-ion participating reaction                                                     | 10                              | 1                | 0.17 |
| Molecular weight (g mol <sup>-1</sup> )                                                       | 522.24                          | 79.9             | 12   |
| Calculated theoretical capacity (mAh g <sup>-1</sup> )                                        | ~513                            | ~336             | ~380 |
| Actual weight fraction in the Ga <sub>2</sub> Te <sub>3</sub> -TiO <sub>2</sub> -C composite. | 0.44                            | 0.27             | 0.29 |
| Contributed capacity (mAh g <sup>-1</sup> )                                                   | 226                             | 91               | 110  |
| Capacity contribution (%)                                                                     | 53                              | 21               | 26   |

**Table S4.** Calculation of theoretical capacity of Ga<sub>2</sub>Te<sub>3</sub>-TiO<sub>2</sub>-C(10%) and Ga<sub>2</sub>Te<sub>3</sub>-TiO<sub>2</sub> in LIB.

| Anode materials                                         | Ga <sub>2</sub> Te <sub>3</sub> -TiO <sub>2</sub> -C(10%) |                  |      | Ga <sub>2</sub> Te <sub>3</sub> -TiO <sub>2</sub> |                  |      |
|---------------------------------------------------------|-----------------------------------------------------------|------------------|------|---------------------------------------------------|------------------|------|
| Component                                               | Ga <sub>2</sub> Te <sub>3</sub>                           | TiO <sub>2</sub> | C    | Ga <sub>2</sub> Te <sub>3</sub>                   | TiO <sub>2</sub> | C    |
| Theoretical weight fraction                             | 0.66                                                      | 0.22             | 0.11 | 0.80                                              | 0.20             | -    |
| Theoretical capacity (mAh g <sup>-1</sup> )             | ~513                                                      | ~336             | ~380 | ~513                                              | ~336             | ~380 |
| Contributed theoretical capacity (mAh g <sup>-1</sup> ) | ~339                                                      | ~74              | ~42  | ~410                                              | ~67              | -    |
| Total theoretical capacity (mAh g <sup>-1</sup> )       |                                                           | ~455             |      |                                                   | ~477             |      |

**Table S5.** Coulombic efficiency variation of Ga<sub>2</sub>Te<sub>3</sub>-TiO<sub>2</sub>-C (10%) at various cycle numbers measured at 100 mA g<sup>-1</sup> for LIB.

| Cycle number | Coulombic efficiency (%) |
|--------------|--------------------------|
| 1            | 75.93                    |
| 10           | 92.64                    |
| 20           | 94.57                    |
| 50           | 99.34                    |
| 100          | 99.11                    |
| 150          | 99.13                    |
| 200          | 98.92                    |
| 250          | 98.62                    |
| 300          | 98.54                    |

**Table S6.** Coulombic efficiency variation of Ga<sub>2</sub>Te<sub>3</sub>-TiO<sub>2</sub>-C(10%) at various cycle numbers measured at 500 mA g<sup>-1</sup> for LIB.

| Cycle number | Coulombic efficiency (%) |
|--------------|--------------------------|
| 1            | 73.29                    |
| 10           | 98.56                    |
| 20           | 98.62                    |
| 50           | 98.33                    |
| 100          | 99.39                    |
| 200          | 99.30                    |
| 300          | 99.15                    |
| 400          | 98.65                    |
| 500          | 98.94                    |

**Table S7.** Coulombic efficiency of Ga<sub>2</sub>Te<sub>3</sub>-TiO<sub>2</sub>-C at current density of 100 mA g<sup>-1</sup> during initial 10 cycles for LIB.

| Cycle number | Coulombic efficiency (%)                                   |                                                            |                                                            |
|--------------|------------------------------------------------------------|------------------------------------------------------------|------------------------------------------------------------|
|              | Ga <sub>2</sub> Te <sub>3</sub> -TiO <sub>2</sub> -C (10%) | Ga <sub>2</sub> Te <sub>3</sub> -TiO <sub>2</sub> -C (20%) | Ga <sub>2</sub> Te <sub>3</sub> -TiO <sub>2</sub> -C (30%) |
| 1st          | 75.94                                                      | 69.95                                                      | 72.07                                                      |
| 2nd          | 88.19                                                      | 87.55                                                      | 94.97                                                      |
| 3rd          | 91.29                                                      | 91.19                                                      | 96.52                                                      |
| 4th          | 91.99                                                      | 93.49                                                      | 97.24                                                      |
| 5th          | 92.48                                                      | 93.18                                                      | 97.55                                                      |
| 6th          | 92.55                                                      | 93.38                                                      | 97.91                                                      |
| 7th          | 93.24                                                      | 93.24                                                      | 97.78                                                      |
| 8th          | 95.99                                                      | 89.98                                                      | 98.27                                                      |
| 9th          | 96.84                                                      | 90.53                                                      | 97.89                                                      |
| 10th         | 98.64                                                      | 93.62                                                      | 98.48                                                      |

**Table S8.** Coulombic efficiency of Ga<sub>2</sub>Te<sub>3</sub>-TiO<sub>2</sub>-C at current density of 500 mA g<sup>-1</sup> during initial 10 cycles for LIB.

| Cycle number | Coulombic efficiency (%)                                   |                                                            |                                                            |
|--------------|------------------------------------------------------------|------------------------------------------------------------|------------------------------------------------------------|
|              | Ga <sub>2</sub> Te <sub>3</sub> -TiO <sub>2</sub> -C (10%) | Ga <sub>2</sub> Te <sub>3</sub> -TiO <sub>2</sub> -C (20%) | Ga <sub>2</sub> Te <sub>3</sub> -TiO <sub>2</sub> -C (30%) |
| 1st          | 73.29                                                      | 71.63                                                      | 69.26                                                      |
| 2nd          | 95.11                                                      | 93.92                                                      | 94.98                                                      |
| 3rd          | 97.31                                                      | 96.74                                                      | 97.05                                                      |
| 4th          | 97.89                                                      | 97.89                                                      | 97.76                                                      |
| 5th          | 98.16                                                      | 98.29                                                      | 98.19                                                      |
| 6th          | 98.37                                                      | 98.22                                                      | 98.44                                                      |
| 7th          | 97.68                                                      | 98.31                                                      | 98.53                                                      |
| 8th          | 98.44                                                      | 98.47                                                      | 98.54                                                      |
| 9th          | 98.42                                                      | 98.42                                                      | 98.67                                                      |
| 10th         | 98.56                                                      | 98.40                                                      | 98.18                                                      |

**Table S9.** Charge-transfer resistance ( $R_{ct}$ ) of Ga<sub>2</sub>Te<sub>3</sub>-TiO<sub>2</sub>-C for LIB.

|           | Ga <sub>2</sub> Te <sub>3</sub> -TiO <sub>2</sub> -C (10%) | Ga <sub>2</sub> Te <sub>3</sub> -TiO <sub>2</sub> -C (20%) | Ga <sub>2</sub> Te <sub>3</sub> -TiO <sub>2</sub> -C (30%) |
|-----------|------------------------------------------------------------|------------------------------------------------------------|------------------------------------------------------------|
| 1 cycle   | 646.7 $\Omega$                                             | 512.3 $\Omega$                                             | 249.8 $\Omega$                                             |
| 5 cycles  | 127.9 $\Omega$                                             | 140.03 $\Omega$                                            | 183.37 $\Omega$                                            |
| 20 cycles | 24.6 $\Omega$                                              | 56.9 $\Omega$                                              | 76.4 $\Omega$                                              |
